# Supplementary material
Source: PubMed Central journal article supplement (PMC5512132)
Supplement: ml7b00168_si_001.pdf [file ml7b00168_si_001.pdf]

## ***Supporting Information***

Development of potent myostatin inhibitory peptides through hydrophobic residue-directed structural modification

*Kentaro Takayama, Cédric Rentier, Tomo Asari, Akari Nakamura, Yusuke Saga, Takahiro Shimada, Kei Nirasawa, Eri Sasaki, Kyohei Muguruma, Akihiro Taguchi, Atsuhiko Taniguchi, Yoichi Negishi, and Yoshio Hayashi\**

### *Table of contents*

|                               |             |
|-------------------------------|-------------|
| Materials and Methods         | page S2     |
| Analytical HPLC chromatograms | page S6-S22 |
| Table S1                      | page S23    |
| Figure S1                     | page S24    |
| Figure S2                     | page S25    |
| Figure S3                     | page S26    |

## 1. Materials

Reagents and solvents, which were used as received, were purchased from Wako Pure Chemical Industries (Osaka, Japan), Sigma-Aldrich (St. Louis, MO), Watanabe Chemical Industries (Hiroshima, Japan), and Tokyo Chemical Industries (Tokyo, Japan). Sterile Dulbecco's Modified Eagle's Medium (DMEM) and fetal bovine serum (FBS) were purchased from Nacalai Tesque (Kyoto, Japan) and Life Technologies (Carlsbad, CA), respectively. Sterile 100-mm dishes, 96-well clear-wall poly-D-Lys-coated plates and 96-well white-wall plates were purchased from BD Biosciences (Franklin Lake, NJ), Thermo Fisher Scientific (Waltham, MA) and Corning (Cambridge, MA), respectively. Plasmids, FuGENE HD and Dual-Luciferase Reporter Assay System for cell-based assay were purchased from Promega (Madison, WI). Recombinant human/mouse/rat myostatin and mouse myostatin-derived recombinant prodomain protein were purchased from Merck Millipore (Billerica, MA) and R&D Systems (Minneapolis, MN), respectively.

## 2. Synthesis of Peptide Derivatives

Fmoc-amino acids/R-COOH (0.141 mmol) were sequentially coupled to a Fmoc-NH-SAL Resin (100 mg, 0.047 mmol) using the DIPCI (0.141 mmol)-HOBt (0.141 mmol) method. Coupling steps were performed for 2 h in DMF (1.0 mL) after removal of each Fmoc group with 20% piperidine-DMF (1.5 mL, 20 min) to obtain resin-bound peptide. Cleavage from the resins was achieved by treatment with TFA-*m*-cresol-thioanisole-EDT (4.0 mL, 40:1:1:1 v:v:v:v) for 150–180 min at room temperature, followed by preparative RP-HPLC purification in a 0.1% aqueous TFA-CH<sub>3</sub>CN system to obtain peptide agonists as TFA salts. The purity of synthesized peptides was > 95% in RP-HPLC analysis using a C18 reverse-phase column [4.6 x 150 mm; Waters SunFire C18 5μm] with a binary solvent system: a linear gradient of CH<sub>3</sub>CN (20–40%, 40 min) in 0.1% aqueous TFA at a flow rate of 1.0 mL/min, detected at UV 230 nm. Yields of all products obtained as a white powder were calculated as TFA salts. HR-MS (TOF MS ES+) was recorded on a micromass LCT. Analytical data of synthetic peptide derivatives are shown below.

I(30,33)L: Yield of 23%; HRMS  $m/z$  [M+H]<sup>+</sup> found 2884.7117 (calcd. for C<sub>130</sub>H<sub>223</sub>N<sub>42</sub>O<sub>32</sub> 2884.7114); HPLC purity 100.0% ( $t_R$  = 19.47 min).

I(33,35)L: Yield of 27%; HRMS  $m/z$  [M+H]<sup>+</sup> found 2884.7070 (calcd. for C<sub>130</sub>H<sub>223</sub>N<sub>42</sub>O<sub>32</sub> 2884.7114); HPLC purity 97.7% ( $t_R$  = 17.70 min).

I(35,37)L: Yield of 27%; HRMS  $m/z$  [M+H]<sup>+</sup> found 2884.7090 (calcd. for C<sub>130</sub>H<sub>223</sub>N<sub>42</sub>O<sub>32</sub> 2884.7114); HPLC purity 97.7% ( $t_R$  = 18.71 min).

L(38,41)I: Yield of 11%; HRMS  $m/z$  [M+H]<sup>+</sup> found 2884.7214 (calcd. for C<sub>130</sub>H<sub>223</sub>N<sub>42</sub>O<sub>32</sub> 2884.7114); HPLC purity 98.3% ( $t_R$  = 17.07 min).

L(41,43)I: Yield of 7.5%; HRMS  $m/z$  [M+H]<sup>+</sup> found 2884.7200 (calcd. for C<sub>130</sub>H<sub>223</sub>N<sub>42</sub>O<sub>32</sub> 2884.7114); HPLC purity 98.8% ( $t_R$  = 17.67 min).

L38I: Yield of 14%; HRMS  $m/z$  [M+H]<sup>+</sup> found 2884.7158 (calcd. for C<sub>130</sub>H<sub>223</sub>N<sub>42</sub>O<sub>32</sub> 2884.7114); HPLC purity 100.0% ( $t_R$  = 18.20 min).

L41I: Yield of 17%; HRMS  $m/z$   $[M+H]^+$  found 2884.7124 (calcd. for  $C_{130}H_{223}N_{42}O_{32}$  2884.7114); HPLC purity 99.8% ( $t_R = 18.18$  min).

L43I: Yield of 13%; HRMS  $m/z$   $[M+H]^+$  found 2884.7166 (calcd. for  $C_{130}H_{223}N_{42}O_{32}$  2884.7114); HPLC purity 100.0% ( $t_R = 18.59$  min).

A32V: Yield of 14%; HRMS  $m/z$   $[M+H]^+$  found 2912.7471 (calcd. for  $C_{132}H_{227}N_{42}O_{32}$  2912.7427); HPLC purity 98.6% ( $t_R = 18.44$  min).

A32L: Yield of 28%; HRMS  $m/z$   $[M+H]^+$  found 2926.7581 (calcd. for  $C_{133}H_{229}N_{42}O_{32}$  2926.7583); HPLC purity 97.5% ( $t_R = 19.24$  min).

A32M: Yield of 26%; HRMS  $m/z$   $[M+H]^+$  found 2944.7114 (calcd. for  $C_{132}H_{227}N_{42}O_{32}S$  2944.7147); HPLC purity 100.0% ( $t_R = 18.50$  min).

A32F: Yield of 23%; HRMS  $m/z$   $[M+H]^+$  found 2960.7427 (calcd. for  $C_{136}H_{227}N_{42}O_{32}$  2960.7400); HPLC purity 99.5% ( $t_R = 19.22$  min).

A32W: Yield of 29%; HRMS  $m/z$   $[M+H]^+$  found 2999.7593 (calcd. for  $C_{138}H_{228}N_{43}O_{32}$  2999.7536); HPLC purity 100.0% ( $t_R = 20.23$  min).

A32Y: Yield of 21%; HRMS  $m/z$   $[M+H]^+$  found 2976.7376 (calcd. for  $C_{136}H_{227}N_{42}O_{33}$  2976.7417); HPLC purity 98.9% ( $t_R = 18.90$  min).

A32H: Yield of 20%; HRMS  $m/z$   $[M+H]^+$  found 2950.7312 (calcd. for  $C_{133}H_{225}N_{44}O_{32}$  2950.7332); HPLC purity 98.5% ( $t_R = 15.72$  min).

A32K: Yield of 26%; HRMS  $m/z$   $[M+4H]^{4+}/4$  found 736.2019 (calcd. for  $C_{133}H_{233}N_{43}O_{32}$  736.1982); HPLC purity 100.0% ( $t_R = 19.75$  min).

A32R: Yield of 23%; HRMS  $m/z$   $[M+4H]^{4+}/4$  found 743.1982 (calcd. for  $C_{133}H_{233}N_{45}O_{32}$  743.1997); HPLC purity 100.0% ( $t_R = 18.06$  min).

A32E: Yield of 27%; HRMS  $m/z$   $[M+4H]^{4+}/4$  found 736.6876 (calcd. for  $C_{132}H_{228}N_{42}O_{34}$  736.4351); HPLC purity 100.0% ( $t_R = 19.59$  min).

A32Q: Yield of 25%; HRMS  $m/z$   $[M+4H]^{4+}/4$  found 736.1920 (calcd. for  $C_{132}H_{229}N_{43}O_{33}$  736.1891); HPLC purity 100.0% ( $t_R = 19.84$  min).

**3a**: Yield of 25%; HRMS  $m/z$   $[M+4H]^{4+}/4$  found 750.7043 (calcd. for  $C_{138}H_{231}N_{43}O_{32}$  750.6942); HPLC purity 100.0% ( $t_R = 25.26$  min).

**3b**: Yield of 32%; HRMS  $m/z$   $[M+4H]^{4+}/4$  found 721.4141 (calcd. for  $C_{131}H_{224}N_{40}O_{33}$  721.4270); HPLC purity 100.0% ( $t_R = 26.94$  min).

**3c**: Yield of 39%; HRMS  $m/z$   $[M+4H]^{4+}/4$  found 750.1732 (calcd. for  $C_{139}H_{229}N_{41}O_{33}$  750.1875); HPLC purity 96.8% ( $t_R = 29.15$  min).

**3d**: Yield of 29%; HRMS  $m/z$   $[M+4H]^{4+}/4$  found 750.1732 (calcd. for  $C_{139}H_{229}N_{41}O_{33}$  750.1875); HPLC purity 100.0% ( $t_R = 28.63$  min).

L38F: Yield of 34%; HRMS  $m/z$   $[M+4H]^{4+}/4$  found 730.4254 (calcd. for  $C_{133}H_{224}N_{42}O_{32}$  730.4298); HPLC purity 99.1% ( $t_R = 19.60$  min).

L38W: Yield of 35%; HRMS  $m/z$   $[M+4H]^{4+}/4$  found 740.1840 (calcd. for  $C_{135}H_{225}N_{43}O_{32}$  740.1825); HPLC purity 99.4% ( $t_R = 20.51$  min).

I30V: Yield of 12%; HRMS  $m/z$   $[M+H]^+$  found 2870.6912 (calcd. for  $C_{129}H_{221}N_{42}O_{32}$  2870.6957); HPLC purity 99.1% ( $t_R = 17.35$  min).

I33V: Yield of 17%; HRMS  $m/z$   $[M+H]^+$  found 2870.6987 (calcd. for  $C_{129}H_{221}N_{42}O_{32}$  2870.6957); HPLC purity 98.3% ( $t_R = 17.43$  min).

I35V: Yield of 15%; HRMS  $m/z$   $[M+H]^+$  found 2870.6982 (calcd. for  $C_{129}H_{221}N_{42}O_{32}$  2870.6957); HPLC purity 98.6% ( $t_R = 18.87$  min).

I37V: Yield of 15%; HRMS  $m/z$   $[M+4H]^{4+}/4$  found 718.4222 (calcd. for  $C_{129}H_{224}N_{42}O_{32}$  718.4298); HPLC purity 99.1% ( $t_R = 17.98$  min).

I30F: Yield of 18%; HRMS  $m/z$   $[M+H]^+$  found 2918.6953 (calcd. for  $C_{133}H_{221}N_{42}O_{32}$  2918.6957); HPLC purity 99.0% ( $t_R = 19.07$  min).

I33F: Yield of 33%; HRMS  $m/z$   $[M+H]^+$  found 2918.6973 (calcd. for  $C_{133}H_{221}N_{42}O_{32}$  2918.6957); HPLC purity 100.0% ( $t_R = 18.87$  min).

I35F: Yield of 40%; HRMS  $m/z$   $[M+H]^+$  found 2918.6968 (calcd. for  $C_{133}H_{221}N_{42}O_{32}$  2918.6957); HPLC purity 96.0% ( $t_R = 19.02$  min).

I37F: Yield of 21%; HRMS  $m/z$   $[M+H]^+$  found 2918.6978 (calcd. for  $C_{133}H_{221}N_{42}O_{32}$  2918.6957); HPLC purity 100.0% ( $t_R = 17.78$  min).

### **3. Cell-based assay**

HEK293 cells were subcultured in DMEM containing 10% FBS and nonessential amino acids. The cells were seeded at  $2.0 \times 10^4$  cells per well in the 96-well plates the day before transfection of reporter (pGL4.48[luc2P/SBE/Hygro]) and control (pGL4.74[hRluc/TK]) vectors using FuGENE HD. After 24 h of transfection, the medium was exchanged to serum-free DMEM and the cells were incubated for 8 h at 37 °C under 5% CO<sub>2</sub>. Each synthesized peptide was dissolved with H<sub>2</sub>O, diluted by adding DMEM containing recombinant human/mouse/rat myostatin [final concentration; 8 ng/mL (0.32 nM)], and incubated for 20 min. Cells were treated with a peptide solution and incubated at 37 °C under 5% CO<sub>2</sub>. After 4 h, cells were washed with PBS. The lysates were prepared, and the luciferase activities were measured using a Dual-Luciferase Reporter Assay System according to manufacturer's protocol (Promega). Mouse myostatin-derived recombinant propeptide (prodomain) was used as a positive control and underwent the same manipulation (final concentration, 10 nM). Each experiment was carried out in triplicate. Values represent means  $\pm$  SD (n= 3). Non-linear regressions are performed using GraphPad Prism software, using the integrated log(inhibitor) vs. response – Variable slope (four parameters). Data was normalized based on negative and positive controls using first and last data points of each series as 0 and 100% plateaus, and outliers (ROUT coefficient of 1% was

used to discriminate legitimate data points from outliers) were not included in curve fitting calculations. All the curve fitting parameters details can be found in Table S1.

#### ***4. Measurement of the circular dichroic (CD) spectra***

CD spectra of peptides **1** and **3d** were obtained at 25 °C using a Jasco J-1500 CD spectrometer (JASCO, Japan) in a quartz cell with a 0.5-cm path length. Spectra were collected between 190–250 nm with a scan speed of 100 nm/min, a response time of 1 s, and a bandwidth of 1 nm. Peptide samples with a final concentration of 5 μM were prepared in 20 mM sodium phosphate buffer (pH 7.4) containing 10% 2,2,2-trifluoroethanol. The baseline scan, which was acquired by measuring the buffer alone, was subtracted from the experimental readings. CD data, which were collected every 0.1 nm, were the average of nine scans. The normalized CD data was expressed in the mean residue ellipticity (deg cm<sup>2</sup> dmol<sup>-1</sup>) and plotted as functions of wavelength.

#### ***5. Intramuscular administration of peptide 3d***

Animal studies were approved by the Animal Research Committee of Tokyo University of Pharmacy and Life Sciences. Forty microliter of the peptide solution (0.75 mM peptide **3d** in saline) and saline (control) were intramuscularly injected into left and right tibialis anterior or gastrocnemius muscle of 5-week-old *mdx* or ICR mice, respectively. After two weeks, the treatment was repeated for the same muscle. Then four weeks after the last treatment, the muscles were collected and weighed.

#### ***6. Histological analysis***

The treated GAS muscles were dissected 28 days after the 2nd injection of **3d** or saline at day 14. The frozen tissue sections were prepared transversely (6 μm) using a cryostat. Each section was stained with hematoxylin and eosin and fiber sizes were determined by measuring the area of each myofiber in a fixed area. Two hundred cross-sectioned myofibers were randomly selected from 3 fields of tissue sections from each tissue sample.

*Analytical HPLC chromatograms*

I(30,33)L:

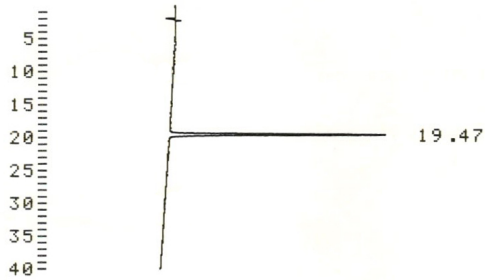

D-2500

METHOD: TAG: 1033 CH: 1

FILE: 0 CALC-METHOD: AREA% TABLE: 0 CONC: AREA

| NO.        | RT    | AREA    | CONC    | BC |
|------------|-------|---------|---------|----|
| 1          | 19.47 | 1958411 | 100.000 | BB |
| TOTAL      |       | 1958411 | 100.000 |    |
| PEAK REJ : |       | 10000   |         |    |

I(33,35)L:

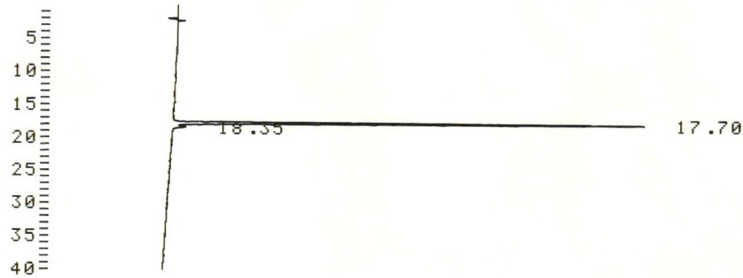

D-2500

METHOD: TAG: 1034 CH: 1

FILE: 0 CALC-METHOD: AREA% TABLE: 0 CONC: AREA

| NO.        | RT    | AREA    | CONC    | BC  |
|------------|-------|---------|---------|-----|
| 1          | 17.70 | 3566123 | 97.732  | BU  |
| 2          | 18.35 | 82742   | 2.268   | TBB |
| TOTAL      |       | 3648865 | 100.000 |     |
| PEAK REJ : |       | 10000   |         |     |

I(35,37)L:

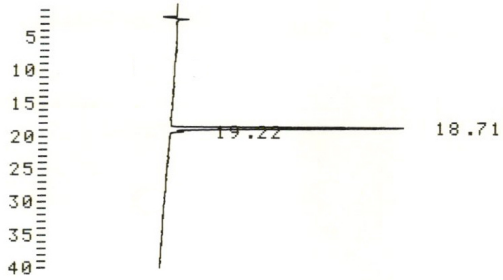

D-2500

METHOD: TAG: 1036 CH: 1

FILE: 0 CALC-METHOD: AREA% TABLE: 0 CONC: AREA

| NO.        | RT    | AREA    | CONC    | BC  |
|------------|-------|---------|---------|-----|
| 1          | 18.71 | 1962018 | 97.668  | BU  |
| 2          | 19.22 | 46844   | 2.332   | TBB |
| TOTAL      |       | 2008862 | 100.000 |     |
| PEAK REJ : |       | 10000   |         |     |

L(38,41)I:

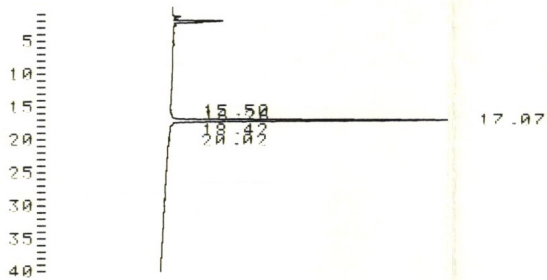

D-2500

METHOD: TAG: 76 CH: 1

FILE: 0 CALC-METHOD: AREA% TABLE: 0 CONC: AREA

| NO.        | RT    | AREA    | CONC    | BC  |
|------------|-------|---------|---------|-----|
| 5          | 16.26 | 35959   | 1.297   | UU  |
| 6          | 17.07 | 2723655 | 98.250  | UU  |
| 7          | 18.42 | 12553   | 0.453   | TBB |
| TOTAL      |       | 2772167 | 100.000 |     |
| PEAK REJ : |       | 10000   |         |     |

L(41,43)I:

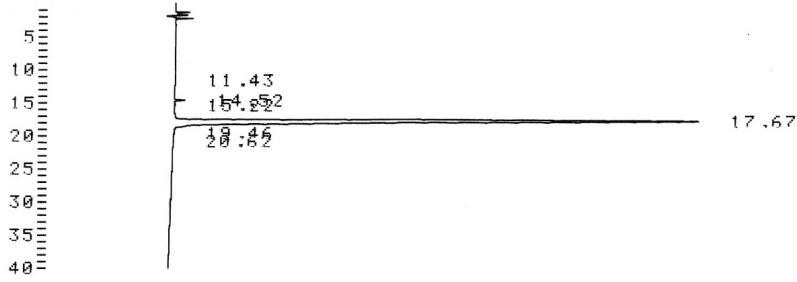

D-2500

METHOD: TAG: 352 CH: 1

FILE: 0 CALC-METHOD: AREA% TABLE: 0 CONC: AREA

| NO.        | RT    | AREA     | CONC    | BC  |
|------------|-------|----------|---------|-----|
| 1          | 11.43 | 10199    | 0.058   | BB  |
| 2          | 14.52 | 149527   | 0.849   | BU  |
| 3          | 15.22 | 27688    | 0.157   | UU  |
| 4          | 17.67 | 17400985 | 98.835  | UU  |
| 5          | 19.46 | 17677    | 0.100   | TBB |
| TOTAL      |       | 17606076 | 100.000 |     |
| PEAK REJ : |       | 10000    |         |     |

L38I:

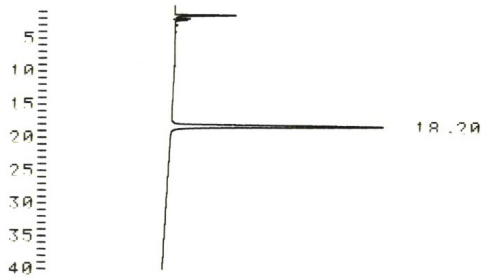

D-2500

METHOD: TAG: 184 CH: 1

FILE: 0 CALC-METHOD: AREA% TABLE: 0 CONC: AREA

| NO.        | RT    | AREA    | CONC    | BC |
|------------|-------|---------|---------|----|
| 1          | 18.20 | 2918253 | 100.000 | BB |
| TOTAL      |       | 2918253 | 100.000 |    |
| PEAK REJ : |       | 10000   |         |    |



L41I:

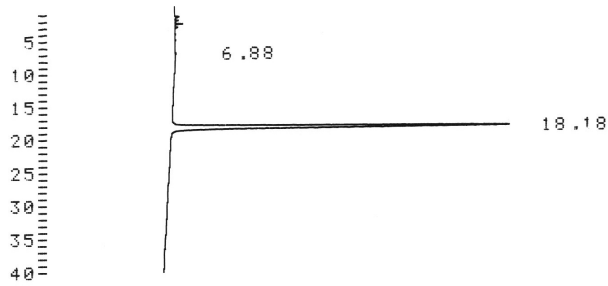

D-2500

METHOD: TAG: 187 CH: 1

FILE: 0 CALC-METHOD: AREA% TABLE: 0 CONC: AREA

| NO.        | RT    | AREA    | CONC    | BC |
|------------|-------|---------|---------|----|
| 1          | 6.88  | 11349   | 0.243   | BB |
| 2          | 18.18 | 4653264 | 99.757  | BB |
| TOTAL      |       | 4664613 | 100.000 |    |
| PEAK REJ : |       | 10000   |         |    |

L43I:

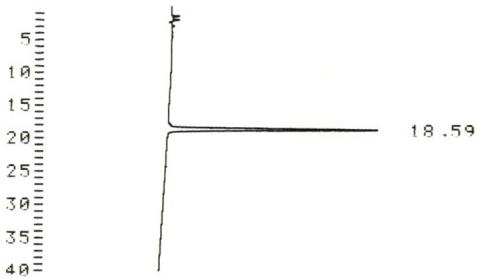

D-2500

METHOD: TAG: 188 CH: 1

FILE: 0 CALC-METHOD: AREA% TABLE: 0 CONC: AREA

| NO.        | RT    | AREA    | CONC    | BC |
|------------|-------|---------|---------|----|
| 1          | 18.59 | 2735800 | 100.000 | BB |
| TOTAL      |       | 2735800 | 100.000 |    |
| PEAK REJ : |       | 10000   |         |    |

A32V:

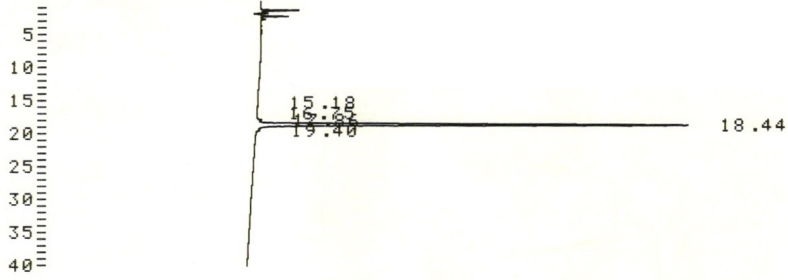

D-2500

METHOD: TAG: 387 CH: 1  
FILE: 0 CALC-METHOD: AREA% TABLE: 0 CONC: AREA

| NO.        | RT    | AREA    | CONC    | BC |
|------------|-------|---------|---------|----|
| 5          | 15.18 | 12612   | 0.284   | UU |
| 7          | 17.86 | 49324   | 1.112   | UU |
| 8          | 18.44 | 4372155 | 98.603  | UU |
| TOTAL      |       | 4434091 | 100.000 |    |
| PEAK REJ : |       | 10000   |         |    |

A32L:

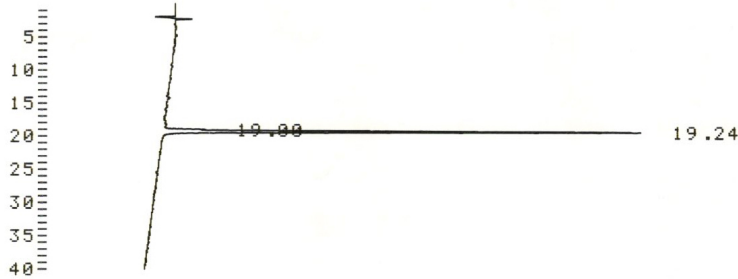

D-2500

METHOD: TAG: 11 CH: 1  
FILE: 0 CALC-METHOD: AREA% TABLE: 0 CONC: AREA

| NO.        | RT    | AREA    | CONC    | BC |
|------------|-------|---------|---------|----|
| 1          | 19.00 | 45018   | 2.459   | BU |
| 2          | 19.24 | 1785421 | 97.541  | UB |
| TOTAL      |       | 1830439 | 100.000 |    |
| PEAK REJ : |       | 10000   |         |    |

A32M:

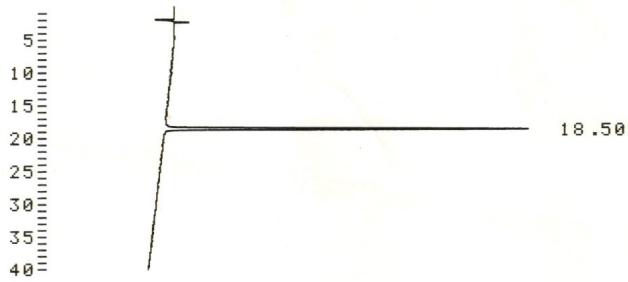

D-2500

METHOD: TAG: 1194 CH: 1  
FILE: 0 CALC-METHOD: AREA% TABLE: 0 CONC: AREA

| NO.   | RT    | AREA    | CONC    | BC |
|-------|-------|---------|---------|----|
| 1     | 18.50 | 1588924 | 100.000 | BB |
| TOTAL |       | 1588924 | 100.000 |    |

PEAK REJ : 10000

A32F:

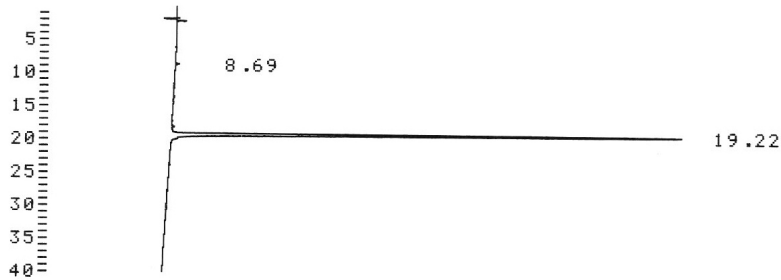

D-2500

METHOD: TAG: 636 CH: 1  
FILE: 0 CALC-METHOD: AREA% TABLE: 0 CONC: AREA

| NO.   | RT    | AREA    | CONC    | BC |
|-------|-------|---------|---------|----|
| 1     | 8.69  | 23918   | 0.491   | BB |
| 2     | 19.22 | 4850562 | 99.509  | BB |
| TOTAL |       | 4874480 | 100.000 |    |

PEAK REJ : 10000

A32W:

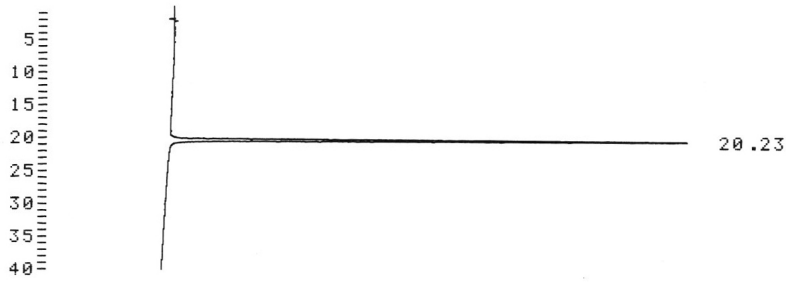

D-2500

METHOD: TAG: 639 CH: 1  
FILE: 0 CALC-METHOD: AREA% TABLE: 0 CONC: AREA

| NO.        | RT    | AREA    | CONC    | BC |
|------------|-------|---------|---------|----|
| 1          | 20.23 | 4599092 | 100.000 | BB |
| TOTAL      |       | 4599092 | 100.000 |    |
| PEAK REJ : |       | 10000   |         |    |

A32Y:

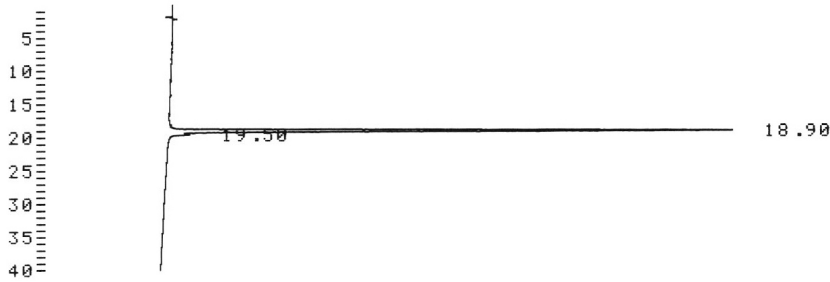

D-2500

METHOD: TAG: 637 CH: 1  
FILE: 0 CALC-METHOD: AREA% TABLE: 0 CONC: AREA

| NO.        | RT    | AREA    | CONC    | BC  |
|------------|-------|---------|---------|-----|
| 1          | 18.90 | 5812614 | 98.905  | BU  |
| 2          | 19.50 | 64349   | 1.095   | TBB |
| TOTAL      |       | 5876963 | 100.000 |     |
| PEAK REJ : |       | 10000   |         |     |

A32H:

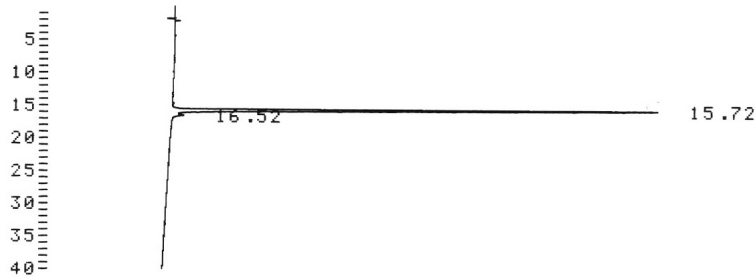

D-2500

METHOD: TAG: 638 CH: 1  
FILE: 0 CALC-METHOD: AREA% TABLE: 0 CONC: AREA

| NO.        | RT    | AREA    | CONC    | BC  |
|------------|-------|---------|---------|-----|
| 1          | 15.72 | 4548524 | 98.495  | BU  |
| 2          | 16.52 | 69480   | 1.505   | TBB |
| TOTAL      |       | 4618004 | 100.000 |     |
| PEAK REJ : |       | 10000   |         |     |

A32K:

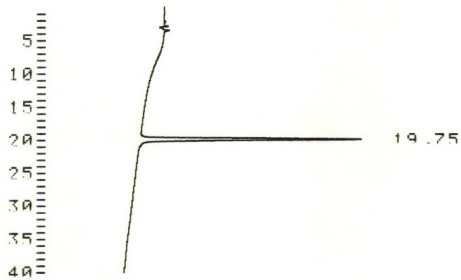

D-2500

METHOD: TAG: 618 CH: 1  
FILE: 0 CALC-METHOD: AREA% TABLE: 0 CONC: AREA

| NO.        | RT    | AREA    | CONC    | BC |
|------------|-------|---------|---------|----|
| 1          | 19.75 | 1424655 | 100.000 | BB |
| TOTAL      |       | 1424655 | 100.000 |    |
| PEAK REJ : |       | 10000   |         |    |

A32R:

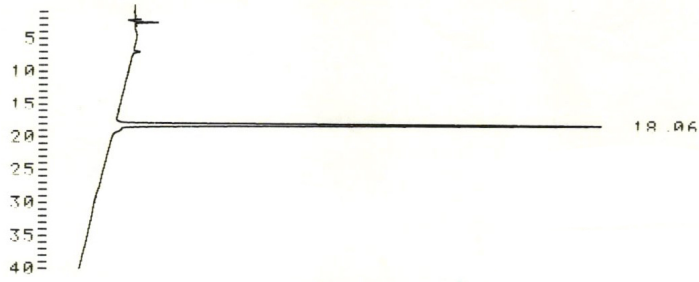

D-2500

METHOD: TAG: 637 CH: 1  
FILE: 0 CALC-METHOD: AREA% TABLE: 0 CONC: AREA

| NO.   | RT    | AREA    | CONC    | BC |
|-------|-------|---------|---------|----|
| 1     | 18.06 | 1452292 | 100.000 | BB |
| TOTAL |       | 1452292 | 100.000 |    |

PEAK REJ : 10000

A32E:

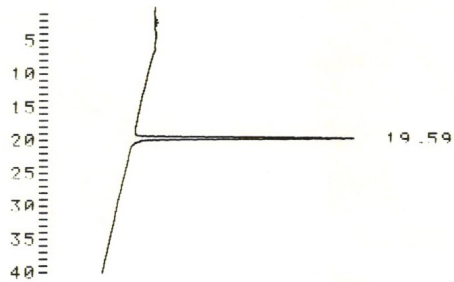

D-2500

METHOD: TAG: 621 CH: 1  
FILE: 0 CALC-METHOD: AREA% TABLE: 0 CONC: AREA

| NO.   | RT    | AREA   | CONC    | BC |
|-------|-------|--------|---------|----|
| 1     | 19.59 | 666646 | 100.000 | BB |
| TOTAL |       | 666646 | 100.000 |    |

PEAK REJ : 10000

A32Q:

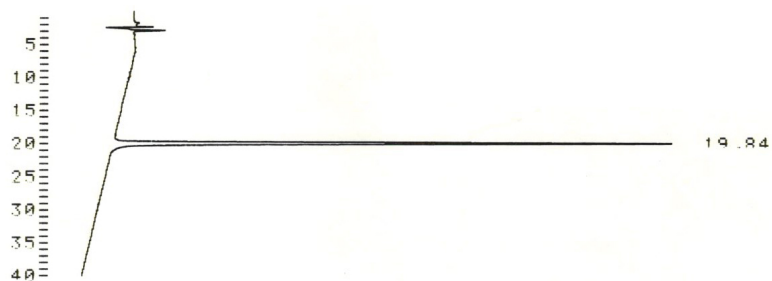

D-2500

METHOD: TAG: 626 CH: 1

FILE: 0 CALC-METHOD: AREA% TABLE: 0 CONC: AREA

| NO.        | RT    | AREA    | CONC    | BC |
|------------|-------|---------|---------|----|
| 1          | 19.84 | 1732657 | 100.000 | BB |
| TOTAL      |       | 1732657 | 100.000 |    |
| PEAK REJ : |       | 10000   |         |    |

3a:

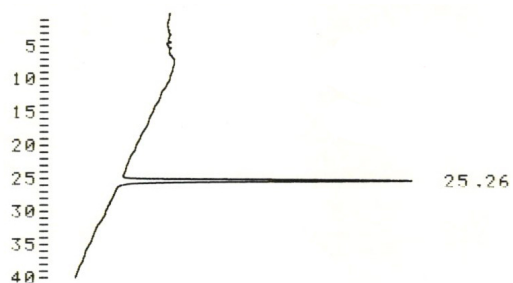

D-2500

METHOD: TAG: 4 CH: 1

FILE: 0 CALC-METHOD: AREA% TABLE: 0 CONC: AREA

| NO.        | RT    | AREA   | CONC    | BC |
|------------|-------|--------|---------|----|
| 1          | 25.26 | 471954 | 100.000 | BB |
| TOTAL      |       | 471954 | 100.000 |    |
| PEAK REJ : |       | 10000  |         |    |

3b:

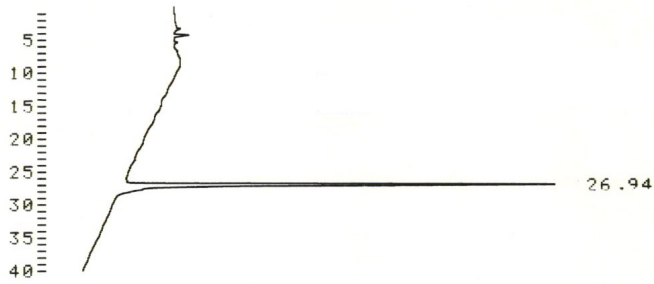

D-2500

METHOD: TAG: 7 CH: 1

FILE: 0 CALC-METHOD: AREA% TABLE: 0 CONC: AREA

| NO.        | RT    | AREA   | CONC    | BC |
|------------|-------|--------|---------|----|
| 1          | 26.94 | 730808 | 100.000 | BB |
| TOTAL      |       | 730808 | 100.000 |    |
| PEAK REJ : |       | 10000  |         |    |

3c:

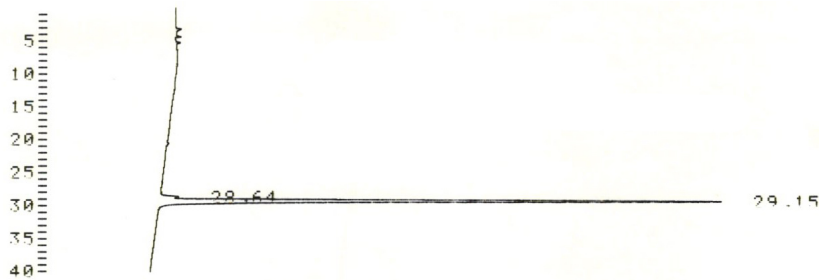

D-2500

METHOD: TAG: 12 CH: 1

FILE: 0 CALC-METHOD: AREA% TABLE: 0 CONC: AREA

| NO.        | RT    | AREA    | CONC    | BC |
|------------|-------|---------|---------|----|
| 2          | 28.64 | 126204  | 3.177   | BU |
| 3          | 29.15 | 3846398 | 96.823  | UB |
| TOTAL      |       | 3972602 | 100.000 |    |
| PEAK REJ : |       | 10000   |         |    |



3d:

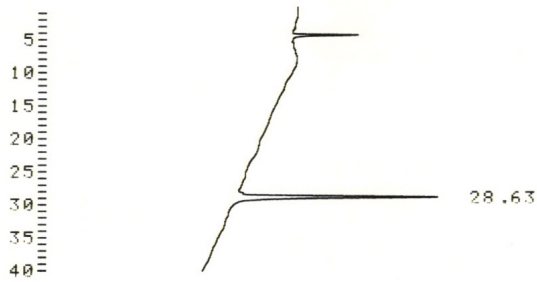

D-2500

METHOD: TAG: 18 CH: 1  
FILE: 0 CALC-METHOD: AREA% TABLE: 0 CONC: AREA

| NO.   | RT    | AREA   | CONC    | RC |
|-------|-------|--------|---------|----|
| 1     | 28.63 | 376544 | 100.000 | BB |
| TOTAL |       | 376544 | 100.000 |    |

PEAK REJ : 10000

L38F:

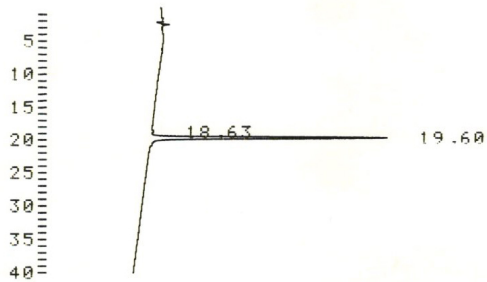

D-2500

METHOD: TAG: 603 CH: 1  
FILE: 0 CALC-METHOD: AREA% TABLE: 0 CONC: AREA

| NO.   | RT    | AREA    | CONC    | RC |
|-------|-------|---------|---------|----|
| 1     | 18.63 | 13839   | 0.949   | BU |
| 2     | 19.60 | 1443886 | 99.051  | UB |
| TOTAL |       | 1457725 | 100.000 |    |

PEAK REJ : 10000

L38W:

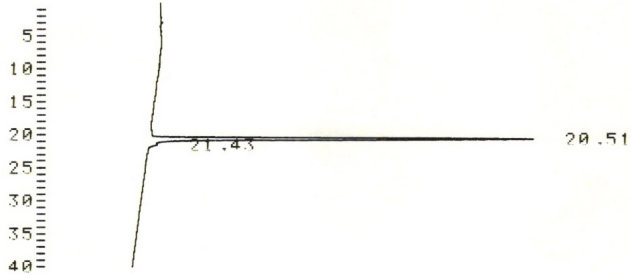

D-2500

METHOD: TAG: 604 CH: 1  
 FILE: 0 CALC-METHOD: AREA% TABLE: 0 CONC: AREA

| NO.   | RT    | AREA    | CONC    | RC  |
|-------|-------|---------|---------|-----|
| 1     | 20.51 | 2494714 | 99.385  | BU  |
| 2     | 21.43 | 15431   | 0.615   | TBB |
| TOTAL |       | 2510145 | 100.000 |     |

PEAK REJ : 10000

I30V:

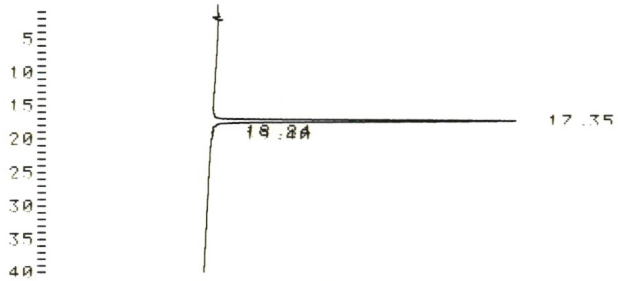

D-2500

METHOD: TAG: 184 CH: 1  
 FILE: 0 CALC-METHOD: AREA% TABLE: 0 CONC: AREA

| NO.   | RT    | AREA    | CONC    | RC  |
|-------|-------|---------|---------|-----|
| 2     | 17.35 | 3517792 | 99.135  | BU  |
| 3     | 18.84 | 14054   | 0.396   | TBB |
| 4     | 19.40 | 16650   | 0.469   | TBB |
| TOTAL |       | 3548496 | 100.000 |     |

PEAK REJ : 10000

I33V:

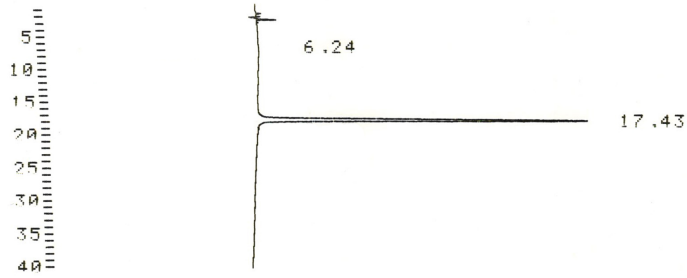

D-2500

METHOD: TAG: 136 CH: 1

FILE: 0 CALC-METHOD: AREA% TABLE: 0 CONC: AREA

| NO.        | RT    | AREA    | CONC    | BC |
|------------|-------|---------|---------|----|
| 1          | 6.24  | 72098   | 1.673   | BU |
| 2          | 17.43 | 4236269 | 98.327  | UU |
| TOTAL      |       | 4308367 | 100.000 |    |
| PEAK RET : |       | 10000   |         |    |

I35V:

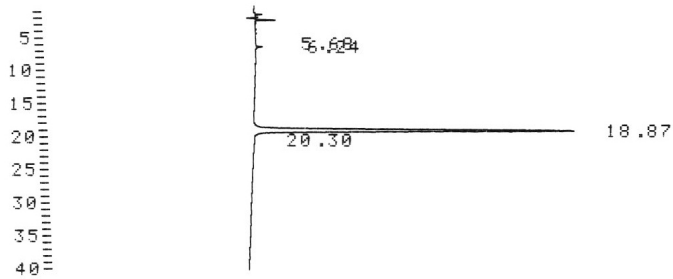

D-2500

METHOD: TAG: 135 CH: 1

FILE: 0 CALC-METHOD: AREA% TABLE: 0 CONC: AREA

| NO.        | RT    | AREA    | CONC    | BC  |
|------------|-------|---------|---------|-----|
| 2          | 6.24  | 47950   | 1.191   | BB  |
| 3          | 18.87 | 3969178 | 98.555  | BU  |
| 4          | 20.30 | 10226   | 0.254   | TBB |
| TOTAL      |       | 4027354 | 100.000 |     |
| PEAK RET : |       | 10000   |         |     |

I37V:

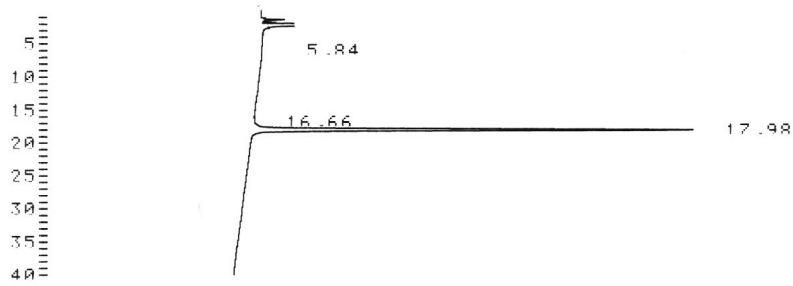

D-2500

METHOD: TAG: 129 CH: 1

FILE: 0 CALC-METHOD: AREA% TABLE: 0 CONC: AREA

| NO.        | RT    | AREA    | CONC    | BC |
|------------|-------|---------|---------|----|
| 1          | 5.84  | 26659   | 0.947   | BB |
| 3          | 17.98 | 2788903 | 99.053  | UB |
| TOTAL      |       | 2815562 | 100.000 |    |
| PEAK REJ : |       | 10000   |         |    |

I30F:

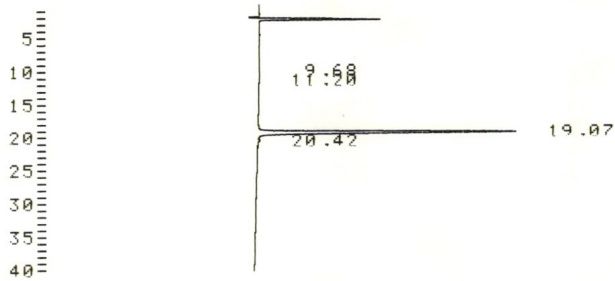

D-2500

METHOD: TAG: 1032 CH: 1

FILE: 0 CALC-METHOD: AREA% TABLE: 0 CONC: AREA

| NO.        | RT    | AREA    | CONC    | BC  |
|------------|-------|---------|---------|-----|
| 5          | 11.20 | 38727   | 0.546   | UU  |
| 6          | 19.07 | 7023679 | 98.981  | UU  |
| 7          | 20.42 | 33578   | 0.473   | TBB |
| TOTAL      |       | 7095984 | 100.000 |     |
| PEAK REJ : |       | 10000   |         |     |

I33F:

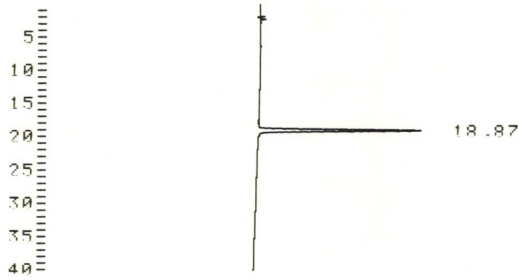

D-2500

METHOD: TAG: 1003 CH: 1  
FILE: 0 CALC-METHOD: AREA% TABLE: 0 CONC: AREA

| NO.        | RT    | AREA    | CONC    | BC |
|------------|-------|---------|---------|----|
| 2          | 18.87 | 3932032 | 100.000 | BU |
| TOTAL      |       | 3932032 | 100.000 |    |
| PEAK REJ : |       | 10000   |         |    |

I35F:

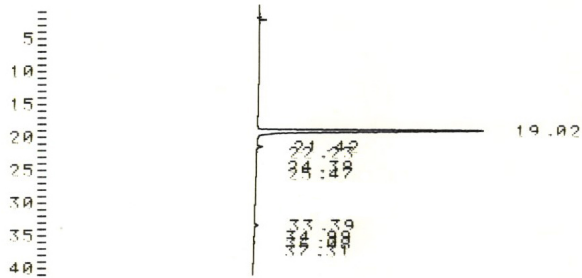

D-2500

METHOD: TAG: 1002 CH: 1  
FILE: 0 CALC-METHOD: AREA% TABLE: 0 CONC: AREA

| NO.        | RT    | AREA    | CONC    | BC  |
|------------|-------|---------|---------|-----|
| 1          | 19.02 | 5861079 | 96.023  | BU  |
| 2          | 21.42 | 100257  | 1.774   | TBB |
| 5          | 25.47 | 22456   | 0.368   | UU  |
| 10         | 33.39 | 81176   | 1.330   | BU  |
| 12         | 36.08 | 14398   | 0.236   | UU  |
| 13         | 37.31 | 16460   | 0.270   | UB  |
| TOTAL      |       | 6103826 | 100.000 |     |
| PEAK REJ : |       | 10000   |         |     |

I37F:

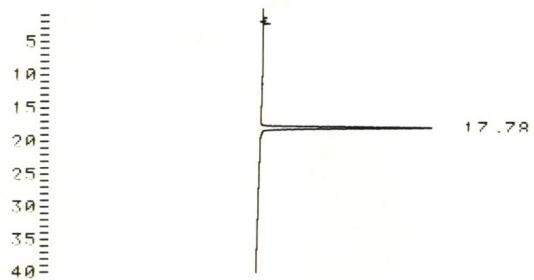

D-2500

METHOD: TAG: 995 CH: 1

FILE: 0 CALC-METHOD: AREA% TABLE: 0 CONC: AREA

| NO.        | RT    | AREA    | CONC    | BC |
|------------|-------|---------|---------|----|
| 4          | 17.78 | 4015991 | 100.000 | BB |
| TOTAL      |       | 4015991 | 100.000 |    |
| PEAK REJ : |       | 10000   |         |    |

**Table S1.** GraphPad Prism parameters obtained for the 4-parametric non-linear regression of dose-response curves of peptides **1** and **3d**.

|                                 | Peptide <b>1</b>         | Peptide <b>3d</b>        |
|---------------------------------|--------------------------|--------------------------|
| <b>Best-fit values</b>          |                          |                          |
| Bottom                          | -0.1120                  | -0.9718                  |
| Top                             | 96.86                    | 104.2                    |
| LogIC <sub>50</sub>             | -5.448                   | -6.492                   |
| HillSlope                       | -3.721                   | -1.866                   |
| IC <sub>50</sub>                | 3.562e-006               | 3.220e-007               |
| Span                            | 96.97                    | 105.2                    |
| <b>Std. Error</b>               |                          |                          |
| Bottom                          | 1.915                    | 2.777                    |
| Top                             | 1.910                    | 3.689                    |
| LogIC <sub>50</sub>             | 0.01569                  | 0.03293                  |
| HillSlope                       | 0.3512                   | 0.2513                   |
| Span                            | 2.838                    | 5.271                    |
| <b>95% Confidence Intervals</b> |                          |                          |
| Bottom                          | -4.221 to 3.997          | -6.765 to 4.821          |
| Top                             | 92.76 to 101.0           | 96.48 to 111.9           |
| LogIC <sub>50</sub>             | -5.482 to -5.415         | -6.561 to -6.423         |
| HillSlope                       | -4.475 to -2.968         | -2.390 to -1.342         |
| IC <sub>50</sub>                | 3.297e-006 to 3.849e-006 | 2.749e-007 to 3.772e-007 |
| Span                            | 90.88 to 103.1           | 94.16 to 116.1           |
| <b>Goodness of Fit</b>          |                          |                          |
| Degrees of Freedom              | 14                       | 20                       |
| R square                        | 0.9924                   | 0.9826                   |
| Absolute Sum of Squares         | 241.4                    | 711.5                    |
| Sy.x                            | 4.153                    | 5.964                    |

A)

|             |    |   |    |    |   |   |   |   |   |   |   |   |   |   |   |   |   |   |   |   |   |   |        |  |
|-------------|----|---|----|----|---|---|---|---|---|---|---|---|---|---|---|---|---|---|---|---|---|---|--------|--|
|             | 21 |   | 38 | 43 |   |   |   |   |   |   |   |   |   |   |   |   |   |   |   |   |   |   |        |  |
| peptide 1   | W  | R | Q  | N  | T | R | S | R | I | E | A | I | K | I | Q | I | L | S | K | L | R | L | -amide |  |
| <b>L38I</b> | W  | R | Q  | N  | T | R | S | R | I | E | A | I | K | I | Q | I | I | S | K | L | R | L | -amide |  |
| -----       |    |   |    |    |   |   |   |   |   |   |   |   |   |   |   |   |   |   |   |   |   |   |        |  |
| <b>L38F</b> | W  | R | Q  | N  | T | R | S | R | I | E | A | I | K | I | Q | I | F | S | K | L | R | L | -amide |  |
| <b>L38W</b> | W  | R | Q  | N  | T | R | S | R | I | E | A | I | K | I | Q | I | W | S | K | L | R | L | -amide |  |

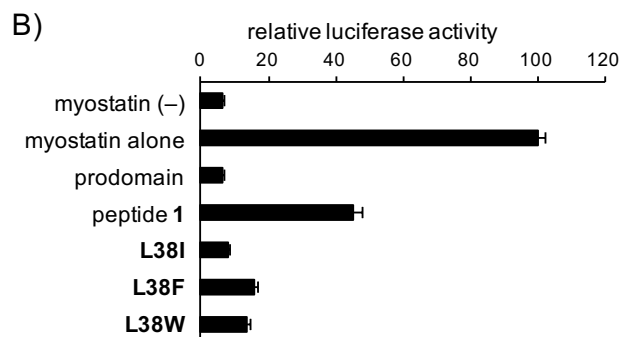

**Figure S1.** (A) Structures of the Leu-substituted peptides at position 38. The numbers above each amino acid indicate its position in the prodomain sequence of mouse myostatin. (B) The luciferase reporter assay determined the activities of the Leu-substituted peptides toward myostatin inhibition relative to peptide 1. Peptide concentration: 3  $\mu$ M. Results are presented as mean values  $\pm$  SD (n = 3).



A)

|           |       |    |    |    |    |    |   |
|-----------|-------|----|----|----|----|----|---|
|           | 21    | 30 | 33 | 35 | 37 | 43 |   |
| peptide 1 | W     | R  | Q  | N  | T  | R  | Y |
|           | S     | R  | I  | E  | A  | I  | K |
|           | I     | Q  | I  | L  | S  | K  | L |
|           | R     | L  | L  | -  | a  | m  | i |
|           | ----- |    |    |    |    |    |   |
| I30V      | W     | R  | Q  | N  | T  | R  | Y |
|           | S     | R  | V  | E  | A  | I  | K |
|           | I     | Q  | I  | L  | S  | K  | L |
|           | R     | L  | L  | -  | a  | m  | i |
| I33V      | W     | R  | Q  | N  | T  | R  | Y |
|           | S     | R  | I  | E  | A  | V  | K |
|           | I     | Q  | I  | L  | S  | K  | L |
|           | R     | L  | L  | -  | a  | m  | i |
| I35V      | W     | R  | Q  | N  | T  | R  | Y |
|           | S     | R  | I  | E  | A  | I  | K |
|           | V     | Q  | I  | L  | S  | K  | L |
|           | R     | L  | L  | -  | a  | m  | i |
| I37V      | W     | R  | Q  | N  | T  | R  | Y |
|           | S     | R  | I  | E  | A  | I  | K |
|           | I     | Q  | V  | L  | S  | K  | L |
|           | R     | L  | L  | -  | a  | m  | i |
| I30F      | W     | R  | Q  | N  | T  | R  | Y |
|           | S     | R  | F  | E  | A  | I  | K |
|           | I     | Q  | I  | L  | S  | K  | L |
|           | R     | L  | L  | -  | a  | m  | i |
| I33F      | W     | R  | Q  | N  | T  | R  | Y |
|           | S     | R  | I  | E  | A  | F  | K |
|           | I     | Q  | I  | L  | S  | K  | L |
|           | R     | L  | L  | -  | a  | m  | i |
| I35F      | W     | R  | Q  | N  | T  | R  | Y |
|           | S     | R  | I  | E  | A  | I  | K |
|           | F     | Q  | I  | L  | S  | K  | L |
|           | R     | L  | L  | -  | a  | m  | i |
| I37F      | W     | R  | Q  | N  | T  | R  | Y |
|           | S     | R  | I  | E  | A  | I  | K |
|           | I     | Q  | F  | L  | S  | K  | L |
|           | R     | L  | L  | -  | a  | m  | i |

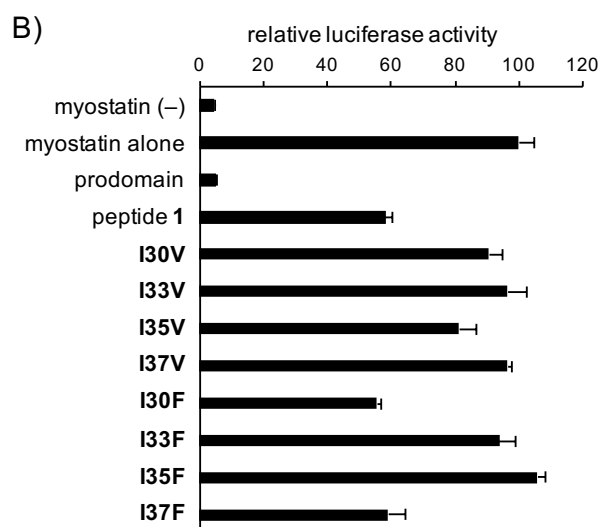

**Figure S2.** (A) Structures of the Ile-substituted peptides. The numbers above each amino acid indicate its position in the prodomain sequence of mouse myostatin. (B) The luciferase reporter assay determined the activities of the Ile-substituted peptides toward myostatin inhibition relative to peptide 1. Peptide concentration: 3  $\mu$ M. Results are presented as mean values  $\pm$  SD (n = 3).

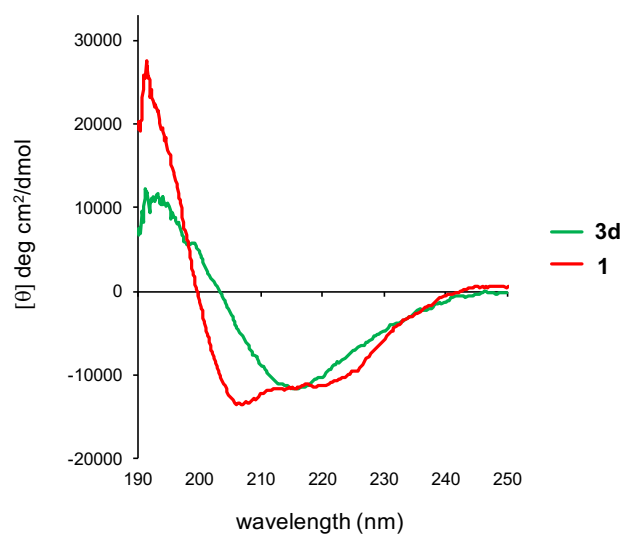

**Figure S3.** CD spectra of peptides **1** and **3d** in 20 mM sodium phosphate buffer (pH 7.4) containing 10% 2,2,2-trifluoroethanol; peptide concentration, 5  $\mu\text{M}$ .
